# Supplementary material for: Presence of Stromal Cells Enhances Epithelial-to-Mesenchymal Transition (EMT) Induction in Lung Bronchial Epithelium after Protracted Exposure to Oxidative Stress of Gamma Radiation
Source: Hindawi journal article supplement (doi:10.1155/2019/4120379), 2019-09-08

**Supplementary Figure 1. Elongation in lung epithelial cell lines BEAS-2B (A) and HBEC-3KT (B) post chronic irradiation with or without MRC-9 fibroblasts. Elongation factor (cell length by cell diameter) was calculated manually by Image J in 50 cells from each sample.**

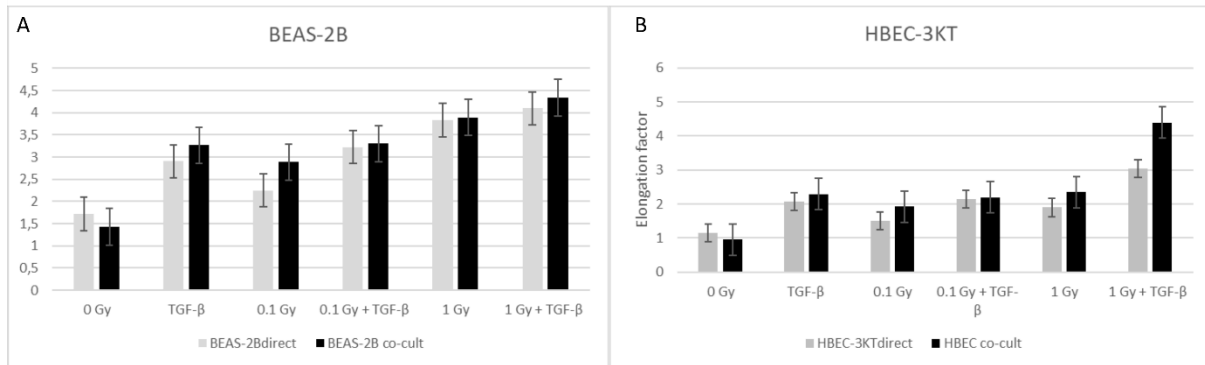

**Supplementary Figure 2. Immunofluorescence staining of vimentin expression in lung epithelial cell line BEAS-2B co-cultured with MRC-9 fibroblasts after protracted irradiation at 1.4 and 14 mGy/h to 0.1 or 1 Gy. Negative control without the fibroblast cells is shown on panel 0 Gy/ - MRC-9.**

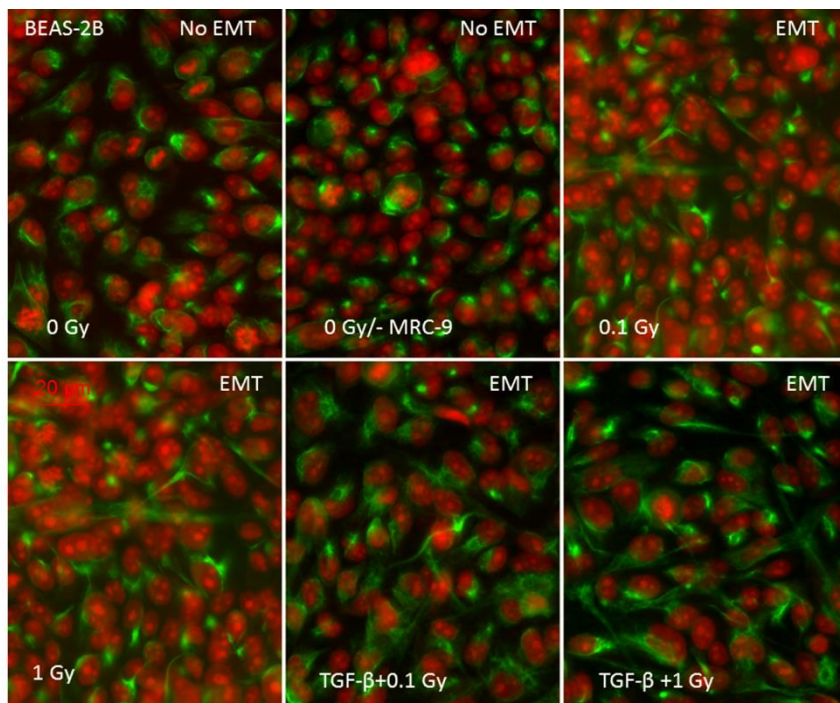

**Supplementary Figure 3. Comparison between the EMT markers' expression in monocultures of bronchial epithelial cells (A) BEAS-2B, vimentin; and (B) HBEC-3K, E-cadherin upper panels; (A and B, lower panels) and co-cultures of the same cells and MRC-9 fibroblasts, after a protracted irradiation at 1.4 and 14 mGy/h to 0.1 or 1 Gy. Vimentin and E-cadherin are stained in green. The nuclei are counterstained with propidium iodide (red). White arrows indicate the EMT-undergone cells. Scale bars - 20  $\mu$ m.**

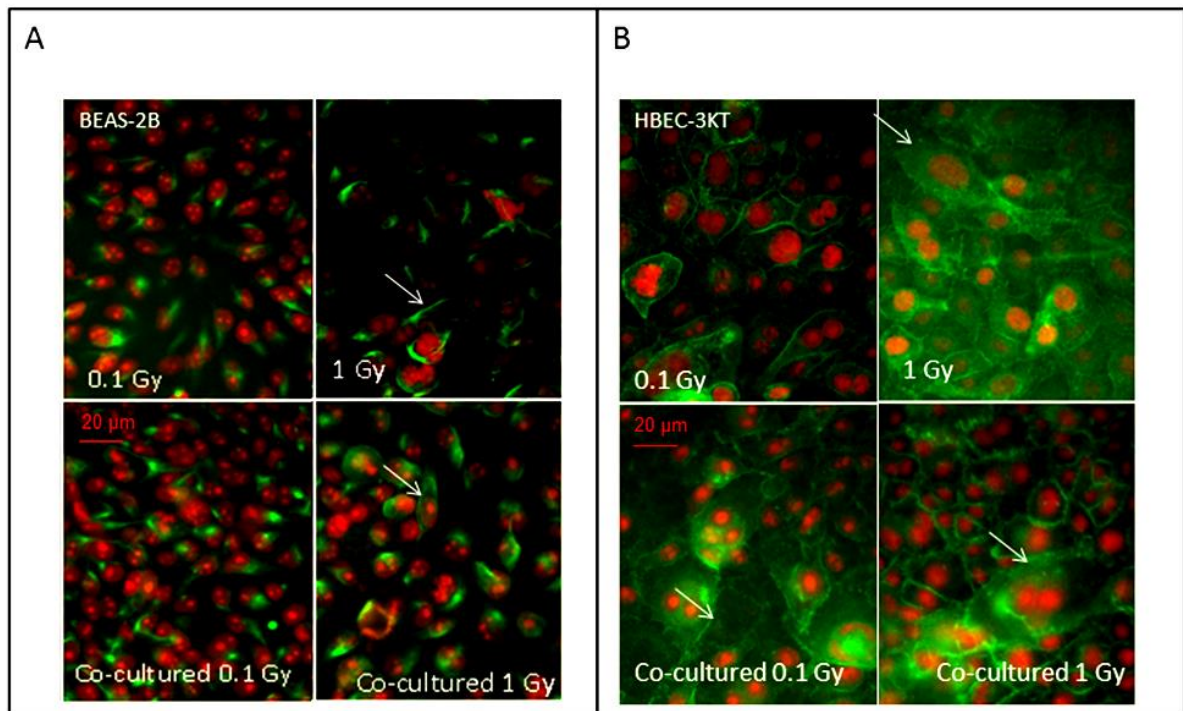

Supplement: f1 [file 4120379.f1.pdf]
